# Supplementary material
Source: MDPI journal article supplement (https://www.mdpi.com/2073-4441/10/4/476)
Supplement: s1 [file s1]

## **Supplemental Material**

### **Assessment of Nitrate in Wells and Springs in the North Central Ethiopian Highlands**

*Adugnaw T. Akale, Mamaru A. Moges, Dessalegn C. Dagneu, Seifu A. Tilahun and Tammo S.  
Steenhuis*

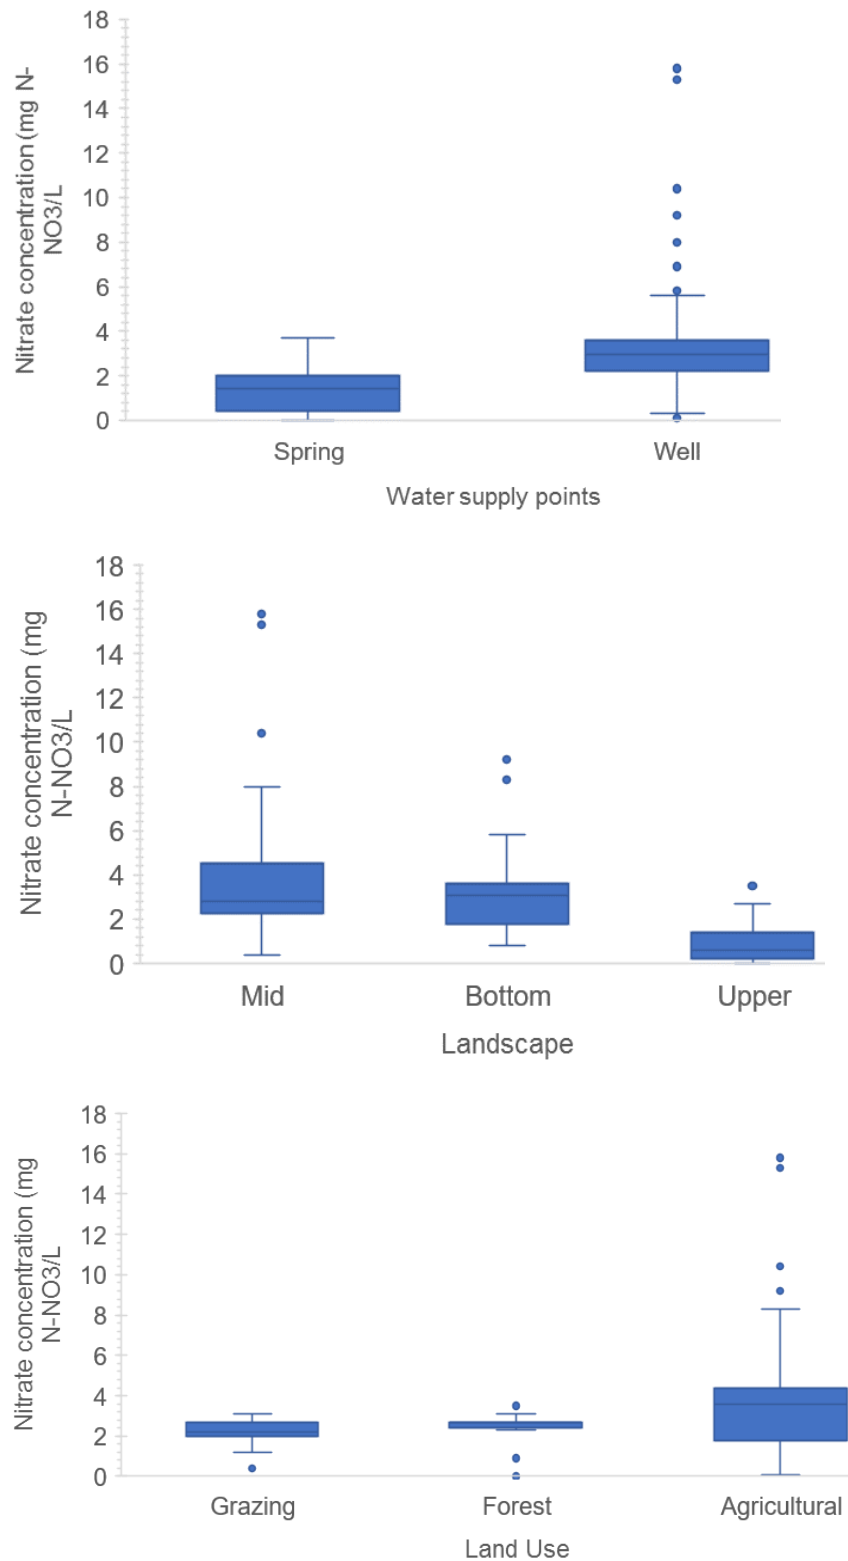

Figure S1. Boxplots of the nitrate concentrations in groundwater measured in developed springs and wells at three hillslope position and land use in the waterpoint drinking area in South Gondar Zone from December 2013 to June 2014

Table S1: Number of waterpoints sampled each month in the four woredas in South Gondar, Ethiopia

| Woreda   | December<br>2013 | January<br>2013 | February<br>2014 | March<br>2014 | April 2014 | May 2014 | June 2014 |
|----------|------------------|-----------------|------------------|---------------|------------|----------|-----------|
| Farta    | 15               | 15              | 25               | 23            |            |          |           |
| Estie    | 6                | 10              | 10               |               | 20         |          |           |
| Dera     |                  | 10              |                  | 20            |            |          | 21        |
| Andabite |                  | 10              | 10               |               | 10         | 8        |           |
